# Supplementary material for: SARS-CoV-2 Spike Mutations, L452R, T478K, E484Q and P681R, in the Second Wave of COVID-19 in Maharashtra, India
Source: MDPI journal article supplement (doi:10.3390/microorganisms9071542), 2021-07-20
Supplement: s1 [file s1]

## Supplementary Figures & Tables

**Figure S1:** The distribution of predominant PangoLIN lineages in the labelled districts of Maharashtra. The size of the pie charts is proportional to the number of genome sequences from the particular district.

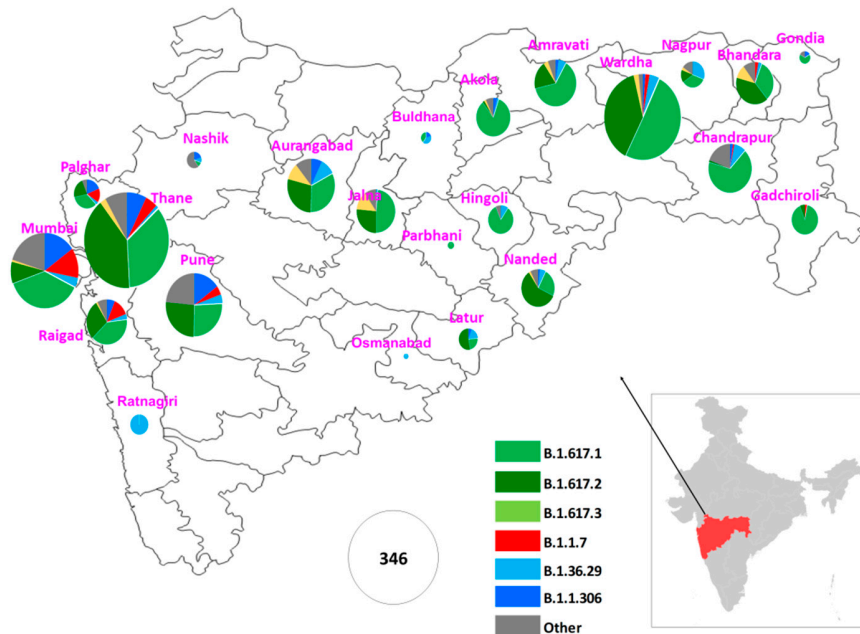

**Figure S2:** Heat map of major mutations in the different proteins of the predominant lineages from November, 2020 to May, 2021

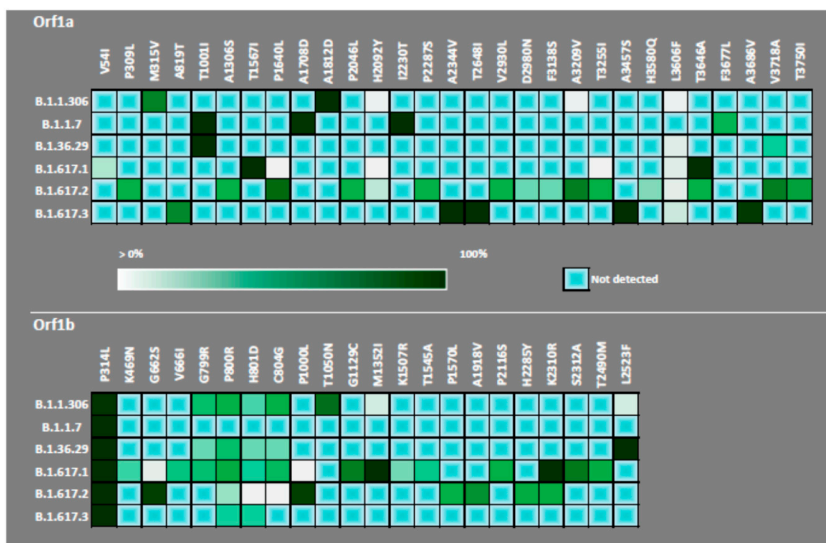

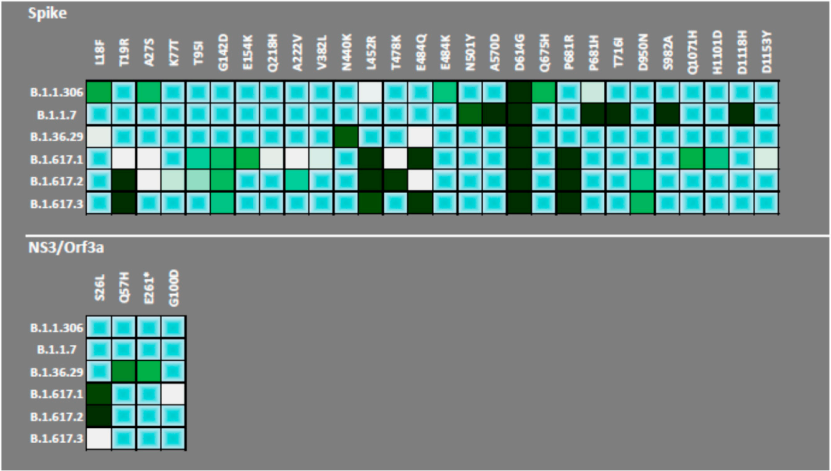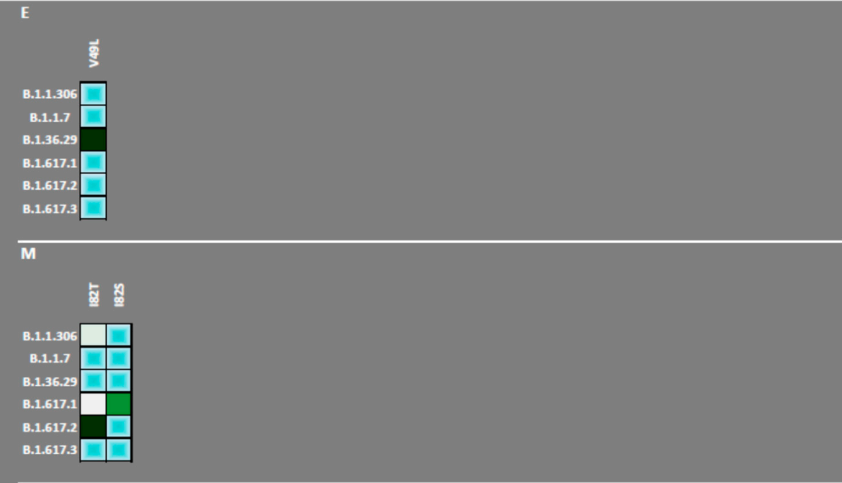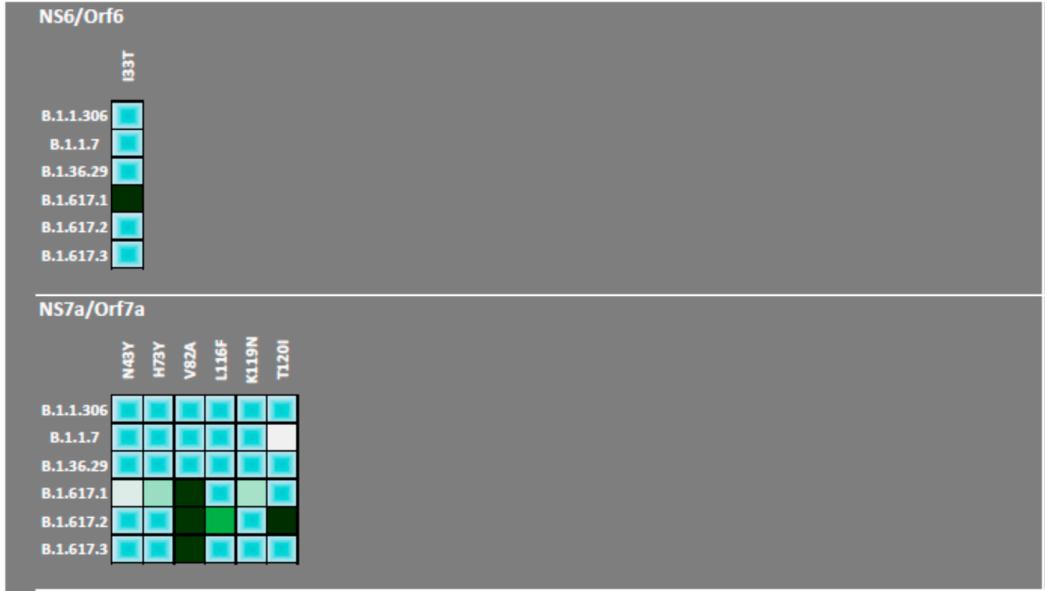

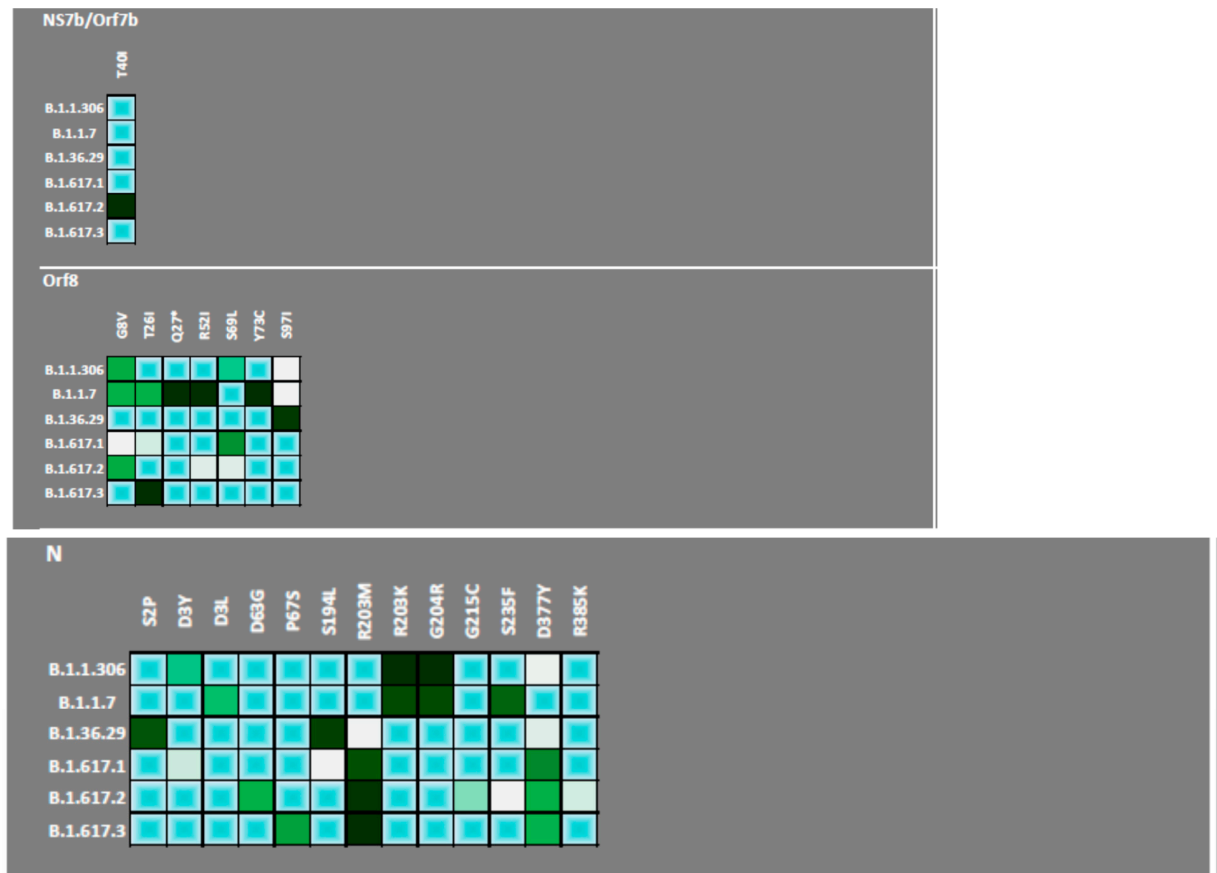

**Figure S3:** Structural complexes of RBD-ACE2 and RBD-Fab. **A.** RBD - ACE2 (PDB Id-6LZG), **B.** RBD - mAb REGN10933(PDB Id-6XDXG) **C.** RBD - mAb P2B-2F6(7bwj)

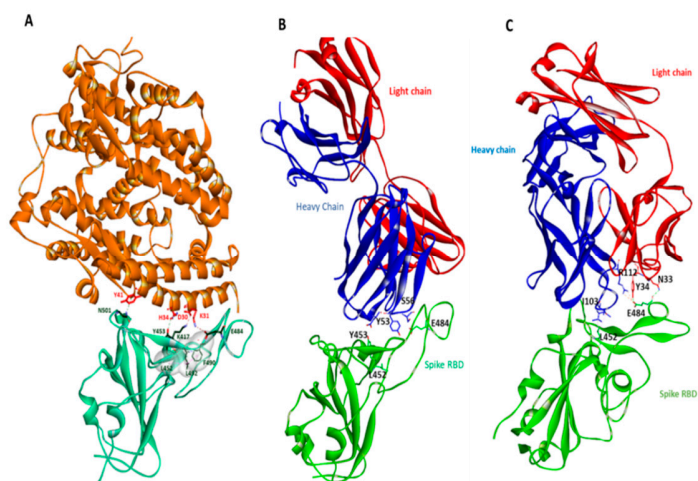

**Figure S4:** Modeling of the SARS-CoV-2 spike protein (with the furin cleavage motif) and effect of P681R mutation (A) Complete spike protein with the residues in the furin cleavage site labelled (B) Wild-type strain with P681 (C) Mutant strain with P681R

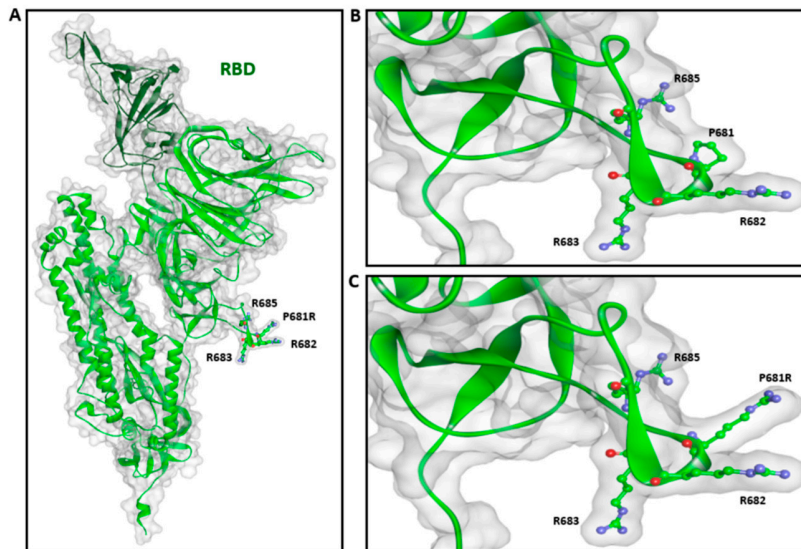

**Figure S5:** Temporal trend of major lineages (top twelve) in India based on sequences from GISAID (As of June 6, 2021) from November, 2020 to May, 2021 (A) India inclusive of Maharashtra (n= 9495 ) (B) India excluding Maharashtra (n=6949).

(A)

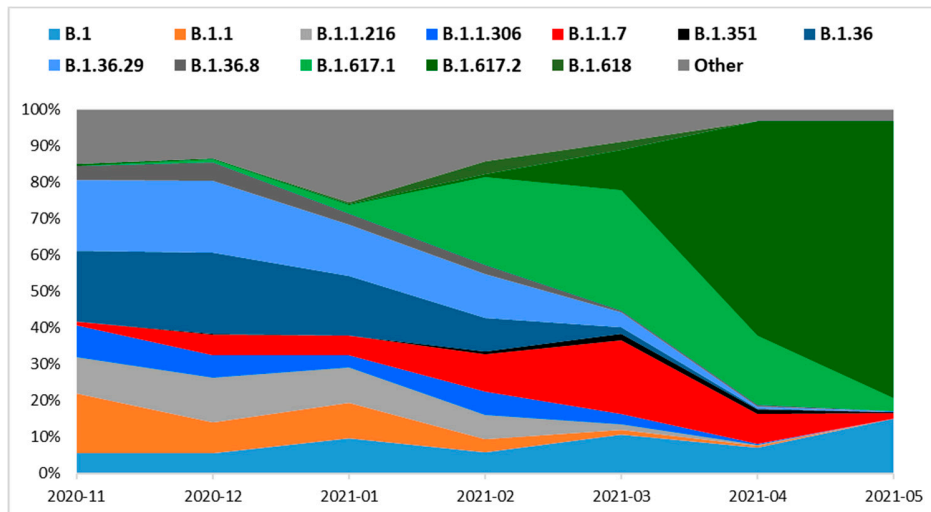

(B)

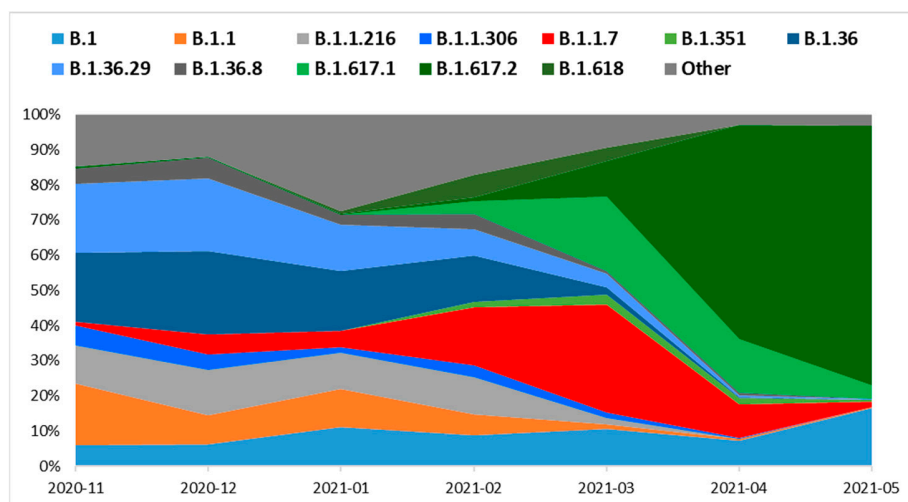

Supplementary Table S1

Supplementary Table S1: Intra and inter-molecular interactions of the wild-type and mutant spike RBD of SARS-CoV-2 with ACE2. The bonds that are made bold in the wild-type indicate those that are disrupted in the mutant strain while the bonds that are bold in the mutant indicate those that are additional when compared to the wild-type strain. Mutant1 indicates the strain of lineage B.1.617.1 and mutant2 indicates a strain of lineage B.1.617.2.

| Spike RBD with ACE2 (6LZG.pdb) (wild-type) |               |            |                              |
|--------------------------------------------|---------------|------------|------------------------------|
| Interactions                               |               |            |                              |
| Sr. No.                                    | RBD-Wild Type | ACE2       | Type                         |
| 1                                          | K417          | D30        | Hydrogen Bond; Electrostatic |
| 2                                          | <b>E484</b>   | <b>K31</b> | <b>Electrostatic</b>         |
| 3                                          | A475          | S19        | Hydrogen Bond                |
| 4                                          | N487          | Q24        | Hydrogen Bond                |
| 5                                          | T500          | Y41        | Hydrogen Bond                |
| 6                                          | G496          | K353       | Hydrogen Bond                |
| 7                                          | Y449          | D38        | Hydrogen Bond                |
| 8                                          | Y449          | Q42        | Hydrogen Bond                |
| 9                                          | N487          | Y83        | Hydrogen Bond                |
| 10                                         | Q493          | E35        | Hydrogen Bond                |
| 11                                         | Q498          | Q42        | Hydrogen Bond                |
| 12                                         | Q498          | Q42        | Hydrogen Bond                |
| 13                                         | G502          | K353       | Hydrogen Bond                |
| 14                                         | Y453          | H34        | Hydrogen Bond                |
| 15                                         | F486          | Y83        | Hydrogen Bond                |
| 16                                         | N501          | Y41        | Hydrogen Bond                |

|           |                  |          |                    |
|-----------|------------------|----------|--------------------|
| 17        | L455             | H34      | Hydrophobic        |
| 18        | F486             | Y83      | Hydrophobic        |
| 19        | Y505             | K353     | Hydrophobic        |
| 20        | F486             | M82      | Hydrophobic        |
| 21        | Y489             | K31      | Hydrophobic        |
| 22        | Y505             | K353     | Hydrophobic        |
| <b>23</b> | <b>L452-L492</b> | <b>-</b> | <b>Hydrophobic</b> |
| 24        | F490-L492        | -        | Hydrophobic        |

**Spike RBD with ACE2 (6LZG.pdb) (L452R & E484Q Mutant1)**

| <b>Interactions</b> |                        |             |                              |
|---------------------|------------------------|-------------|------------------------------|
| <b>Sr. No.</b>      | <b>RBD-Mutant Type</b> | <b>ACE2</b> | <b>Type</b>                  |
| 1                   | K417                   | D30         | Hydrogen Bond; Electrostatic |
| 2                   | A475                   | S19         | Hydrogen Bond                |
| 3                   | N487                   | Q24         | Hydrogen Bond                |
| 4                   | T500                   | Y41         | Hydrogen Bond                |
| 5                   | G496                   | K353        | Hydrogen Bond                |
| 6                   | Y449                   | D38         | Hydrogen Bond                |
| 7                   | Y449                   | Q42         | Hydrogen Bond                |
| 8                   | N487                   | Y83         | Hydrogen Bond                |
| 9                   | Q493                   | E35         | Hydrogen Bond                |
| 10                  | Q498                   | Q42         | Hydrogen Bond                |
| 11                  | Q498                   | Q42         | Hydrogen Bond                |
| 12                  | G502                   | K353        | Hydrogen Bond                |
| 13                  | Y453                   | H34         | Hydrogen Bond                |
| 14                  | F486                   | Y83         | Hydrogen Bond                |
| 15                  | N501                   | Y41         | Hydrogen Bond                |
| 16                  | L455                   | H34         | Hydrophobic                  |
| 17                  | F486                   | Y83         | Hydrophobic                  |
| 18                  | Y505                   | K353        | Hydrophobic                  |
| 19                  | F486                   | M82         | Hydrophobic                  |
| 20                  | Y489                   | K31         | Hydrophobic                  |
| 21                  | Y505                   | K353        | Hydrophobic                  |
| 22                  | F490-L492              | -           | Hydrophobic                  |

**Spike RBD with ACE2 (6LZG.pdb) (L452R & T478K Mutant2)**

| <b>Interactions</b> |      |      |                              |
|---------------------|------|------|------------------------------|
| 1                   | K417 | D30  | Hydrogen Bond; Electrostatic |
| 2                   | A475 | S19  | Hydrogen Bond                |
| 3                   | N487 | Q24  | Hydrogen Bond                |
| 4                   | T500 | Y41  | Hydrogen Bond                |
| 5                   | G496 | K353 | Hydrogen Bond                |
| 6                   | Y449 | D38  | Hydrogen Bond                |
| 7                   | Y449 | Q42  | Hydrogen Bond                |
| 8                   | N487 | Y83  | Hydrogen Bond                |

|           |                  |      |                      |
|-----------|------------------|------|----------------------|
| 9         | Q493             | E35  | Hydrogen Bond        |
| 10        | Q498             | Q42  | Hydrogen Bond        |
| 11        | Q498             | Q42  | Hydrogen Bond        |
| 12        | G502             | K353 | Hydrogen Bond        |
| 13        | Y453             | H34  | Hydrogen Bond        |
| 14        | F486             | Y83  | Hydrogen Bond        |
| 15        | N501             | Y41  | Hydrogen Bond        |
| 16        | L455             | H34  | Hydrophobic          |
| 17        | F486             | Y83  | Hydrophobic          |
| 18        | Y505             | K353 | Hydrophobic          |
| 19        | F486             | M82  | Hydrophobic          |
| 20        | Y489             | K31  | Hydrophobic          |
| 21        | Y505             | K353 | Hydrophobic          |
| 22        | F490-L492        | -    | Hydrophobic          |
| <b>23</b> | <b>K478-F486</b> | -    | <b>Hydrogen Bond</b> |
| <b>24</b> | <b>K478-F486</b> | -    | <b>Hydrogen Bond</b> |
| <b>25</b> | <b>K478-F486</b> | -    | <b>Hydrogen Bond</b> |

**Supplementary Table S2:** Intermolecular interaction of neutralizing antibodies with wild-type and mutant spike RBD of SARS-CoV-2

|   |                                                      |                 |                  |
|---|------------------------------------------------------|-----------------|------------------|
| A | <b>Spike RBD with Antibody REGN10933 (Wild-type)</b> |                 |                  |
|   | <b>Interactions</b>                                  |                 |                  |
|   | <b>RBD</b>                                           | <b>Antibody</b> | <b>Type</b>      |
| 1 | GLU484                                               | H: TYR53        | Hydrogen Bond    |
|   |                                                      | H:SER56         |                  |
| 2 | LYS417                                               | H:ASP31         | Hydrogen Bond    |
|   |                                                      | H:THR28         |                  |
| 3 | PHE486                                               | L: LEU94        | Hydrophobic      |
|   |                                                      | H: ARG100       | Electrostatic    |
|   |                                                      | H:TYR59         | Hydrogen bond    |
| 4 | TYR489                                               | H: TYR53        | Hydrophobic      |
|   | TYR489                                               | H:TYR33         | Hydrogen Bond    |
| 5 | TYR453                                               | H:ASP31         | Hydrogen Bond    |
| 6 | LYS417                                               | H:ASP31         | Hydrogen Bond    |
| 7 | ALA475                                               | H:MET104        | Hydrophobic bond |
| B | <b>Spike RBD with Antibody REGN10933 (Mutant)</b>    |                 |                  |
|   | <b>Interactions</b>                                  |                 |                  |
|   | <b>RBD</b>                                           | <b>Antibody</b> | <b>Type</b>      |

|   |                                                   |                 |                              |
|---|---------------------------------------------------|-----------------|------------------------------|
| 1 | LYS417                                            | H:ASP31         | Hydrogen Bond                |
|   |                                                   | H: THR28        |                              |
| 2 | TYR453                                            | H :ASP31        | Hydrogen Bond                |
| 3 | PHE486                                            | H: ARG100       | Hydrogen Bond                |
|   |                                                   | L: LEU94        |                              |
|   |                                                   | H:TYR59         |                              |
| 4 | ALA475                                            | H:MET104        | Hydrophobic bond             |
| 5 | TYR489                                            | H:TYR53         | Hydrophobic                  |
| 6 | GLN484                                            | H:SER56         | Hydrogen bond                |
| 7 | CYS488                                            | H:TYR33         | Hydrogen bond                |
| C | <b>Spike RBD with Antibody P2B-2F6(Wild-type)</b> |                 |                              |
|   | <b>Interactions</b>                               |                 |                              |
|   | <b>RBD</b>                                        | <b>Antibody</b> | <b>Type</b>                  |
| 1 | LEU452                                            | H: ILE103       | Hydrophobic                  |
|   |                                                   | H:VAL105        |                              |
| 2 | GLU484                                            | L: ASN33        | Hydrogen bond                |
|   |                                                   | L:TYR34         |                              |
| 3 | GLU484                                            | H:ARG112        | Hydrogen bond; Electrostatic |
| 4 | PHE490                                            | H: VAL106       | Hydrophobic                  |
|   |                                                   | H:PRO107        |                              |
| 5 | TYR449                                            | H: SER31        | Hydrogen bond                |
| 6 | ASN450                                            | H: SER30        | Hydrogen bond                |
|   |                                                   | H:SER31         |                              |
| 7 | GLY447                                            | H: TYR27        | Hydrogen bond                |
| D | <b>Spike RBD with Antibody P2B-2F6 A(Mutant)</b>  |                 |                              |
|   | <b>Interactions</b>                               |                 |                              |
|   | <b>RBD</b>                                        | <b>Antibody</b> | <b>Type</b>                  |
| 1 | GLN484                                            | L: ASN33        | Hydrogen bond                |
|   |                                                   | L: TYR34        |                              |
| 2 | ASN450                                            | H: SER30        | Hydrogen bond                |
|   |                                                   | H:SER31         |                              |
| 3 | PHE490                                            | H: VAL106       | Hydrophobic                  |
|   |                                                   | H: PRO107       |                              |



Supplementary Table S3: Major spike protein mutations defining the B.1.617 lineages and proposed effect on structural aspects

| S.No. | Mutations       | Lineage/s                             | Proposed Effect on structural aspects        | Available Reference/s |
|-------|-----------------|---------------------------------------|----------------------------------------------|-----------------------|
| 1.    | E484Q           | B.1.617.1,<br>B.1.617.3               | Decreased binding to select mAb <sup>#</sup> | 32,33                 |
| 2.    | L452R           | B.1.617.1,<br>B.1.617.2,<br>B.1.617.3 | Decreased binding to select mAb <sup>#</sup> | 26, 32, 34, 35,<br>36 |
| 3.    | L452R and E484Q | B.1.617.1,<br>B.1.617.3               | Enhanced ACE2 <sup>§</sup> binding           | 24, 32, 36, 37,       |
| 4.    | L452R and T478K | B.1.617.2                             | Enhanced ACE2 <sup>§</sup> binding           | 38                    |
| 5.    | P681R           | B.1.617.1,<br>B.1.617.2,<br>B.1.617.3 | Enhanced binding to furin                    | 24                    |

<sup>#</sup> Monoclonal antibody

<sup>§</sup>Angiotensin converting enzyme
